# Supplementary material for: Parental stressor exposure simultaneously conveys both adaptive and maladaptive larval phenotypes through epigenetic inheritance in the zebrafish (Danio rerio)
Source: Oxford University Press journal article supplement (doi:10.1242/jeb.208918), 2019-01-01
Supplement: jeb208918supp.pdf [file jeb208918supp.pdf]

**Fig. S1. A) Concentration of PAHs in dietary treatments AND .  $\Sigma$ TotPAH** is the sum of all the different PAHs compounds found in the diet.  $\Sigma$ PAH50 represents the fifty most common PAHs in the toxicology literature. **B) Concentration of Alkyl PAHs estimated from pooled whole body fish per treatment group.** Empty bars and patterned bars refer to female and male fish respectively.

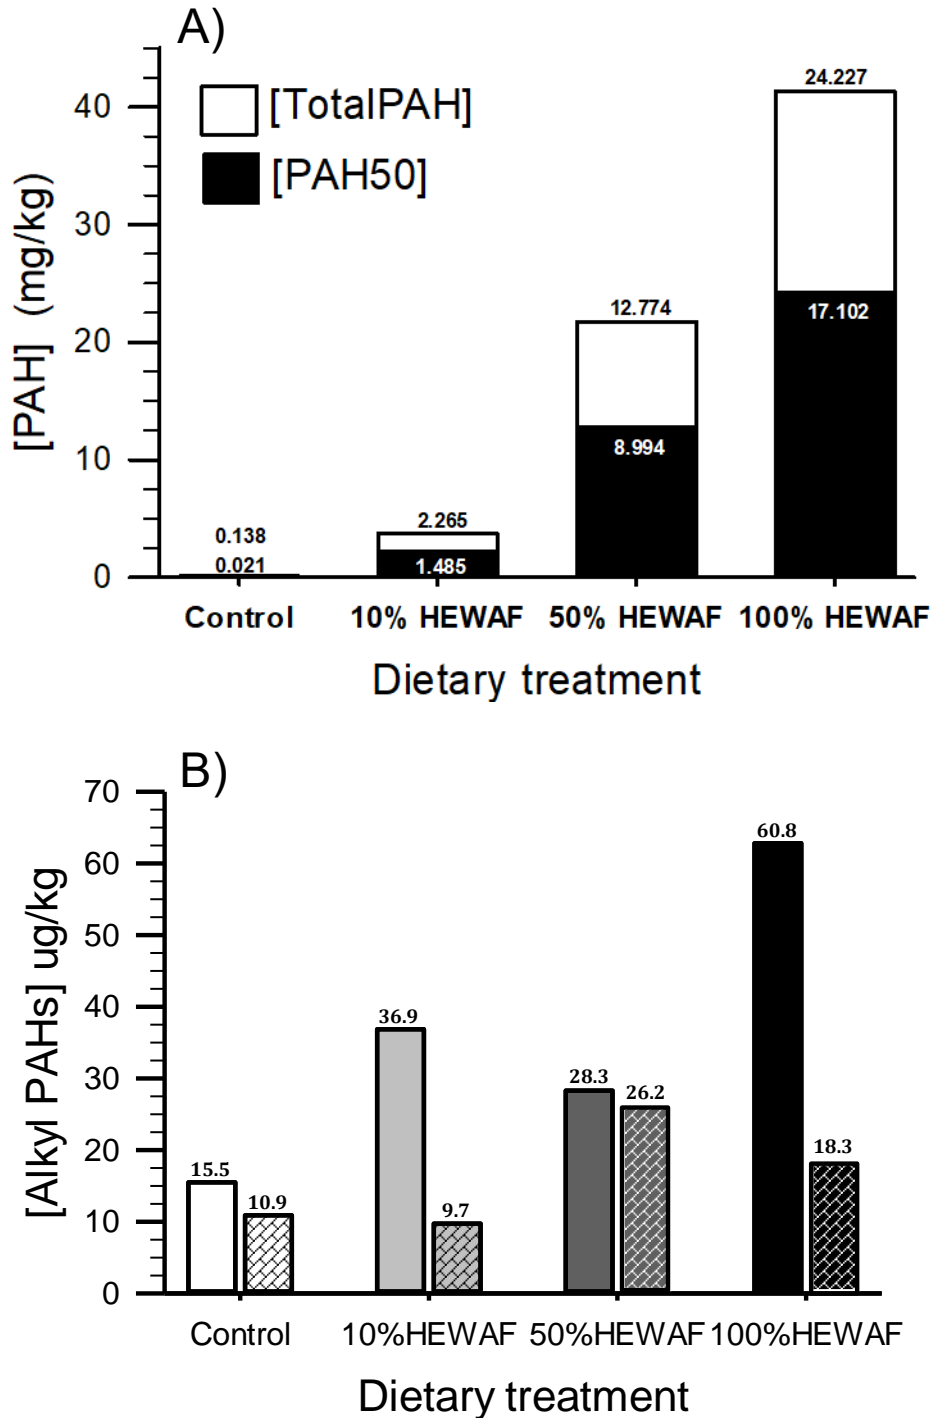

**Fig. S2. Male gonadal sections.** A) Control, B) 10%HEWAF, C) 50%HEWAF and D) 100%HEWAF. L= lumina, S= spermatogonia, SP= spermatocysts

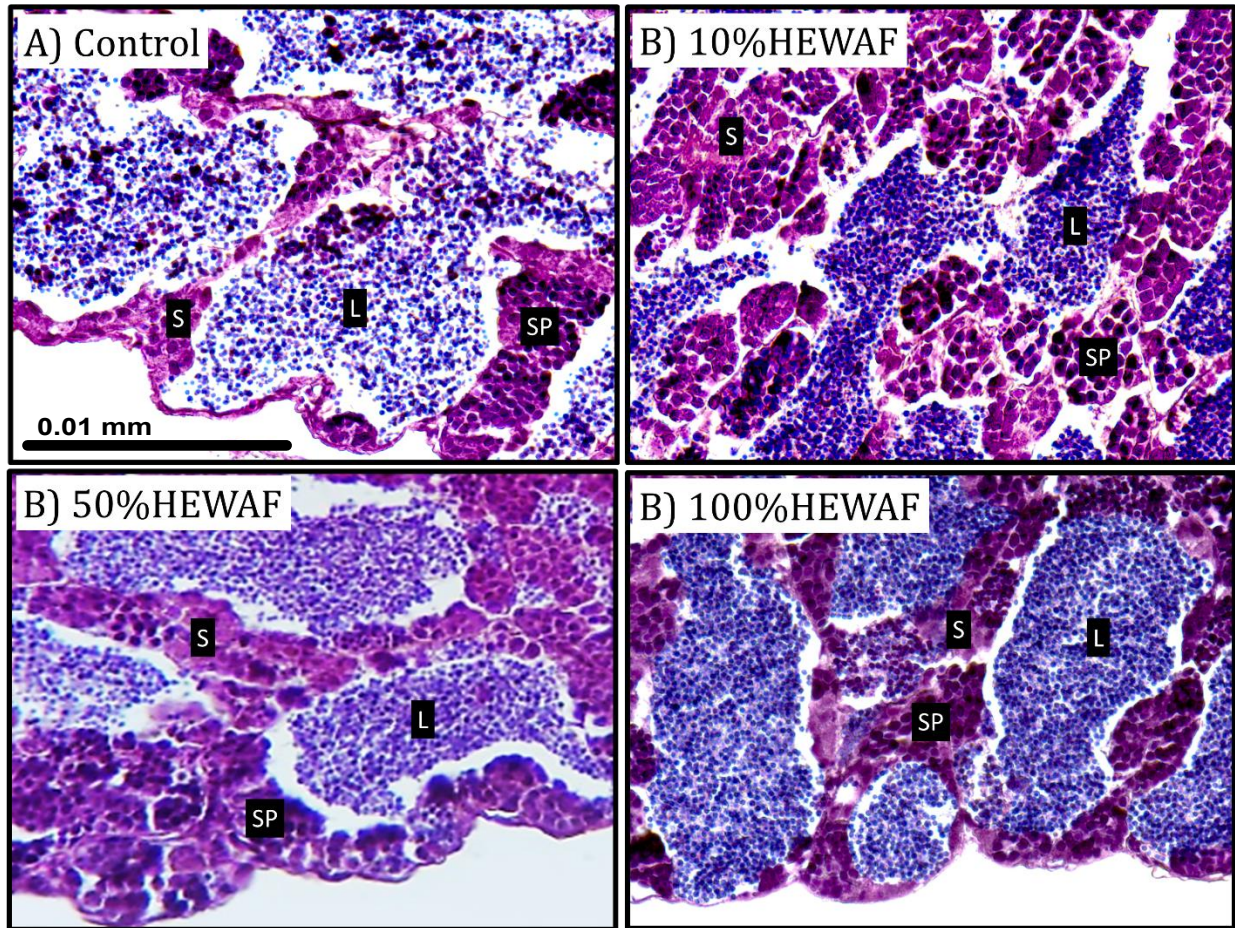

**Fig. S3. Female gonadal sections.** A) Control, B) 10%HEWAF, C) 50%HEWAF and D) 100%HEWAF. PO = Previtellogenic oocytes, VO = vitellogenic oocytes.

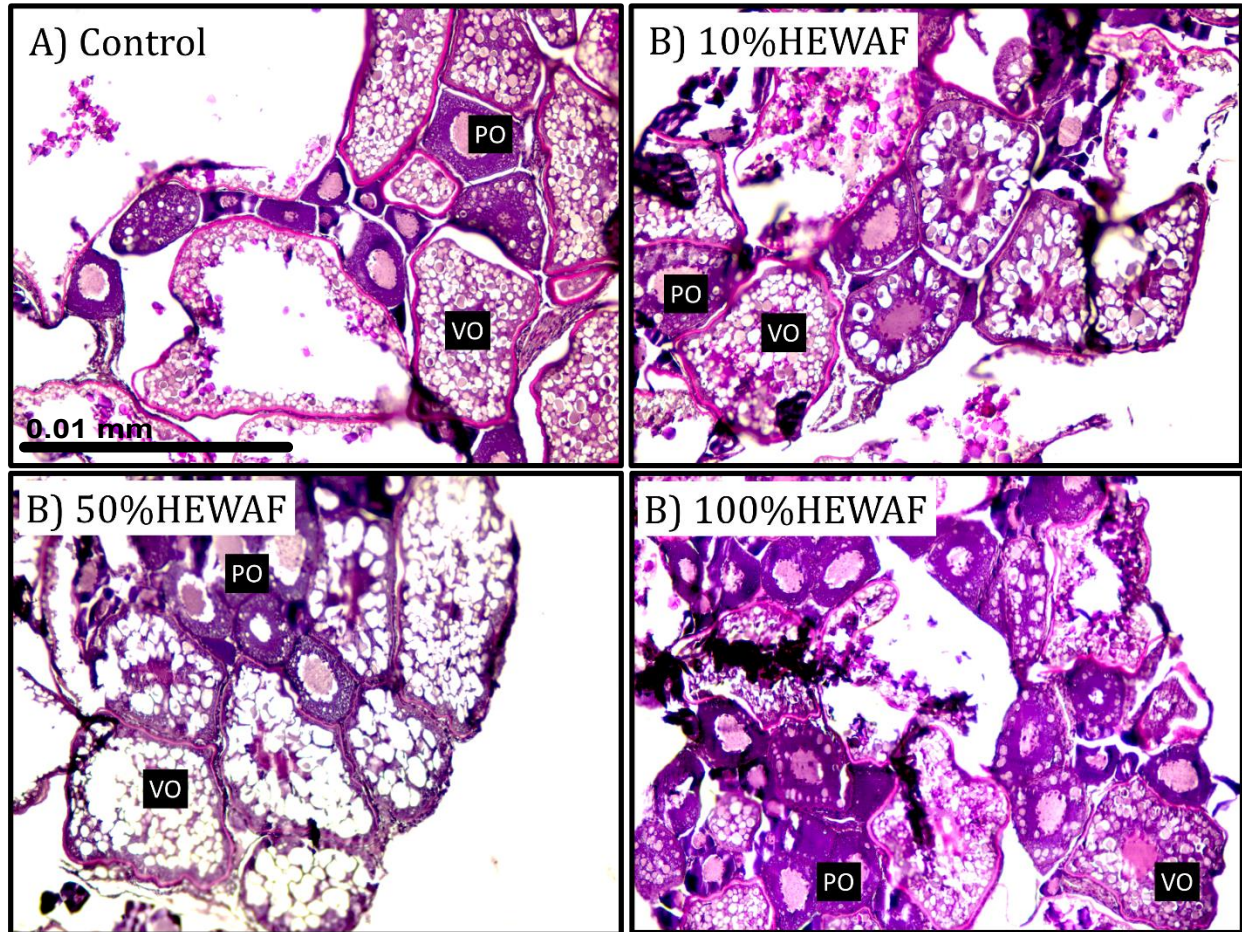

**Fig. S4. Masson's trichrome staining technique in ventricular tissue.** Positive control stains, **A)** gill tissue and **B)** bulbus arteriosus tissue. **C)** Control, **D)** 10%HEWAF, **E)** 50%HEWAF and **F)** 100%HEWAF groups, respectively.

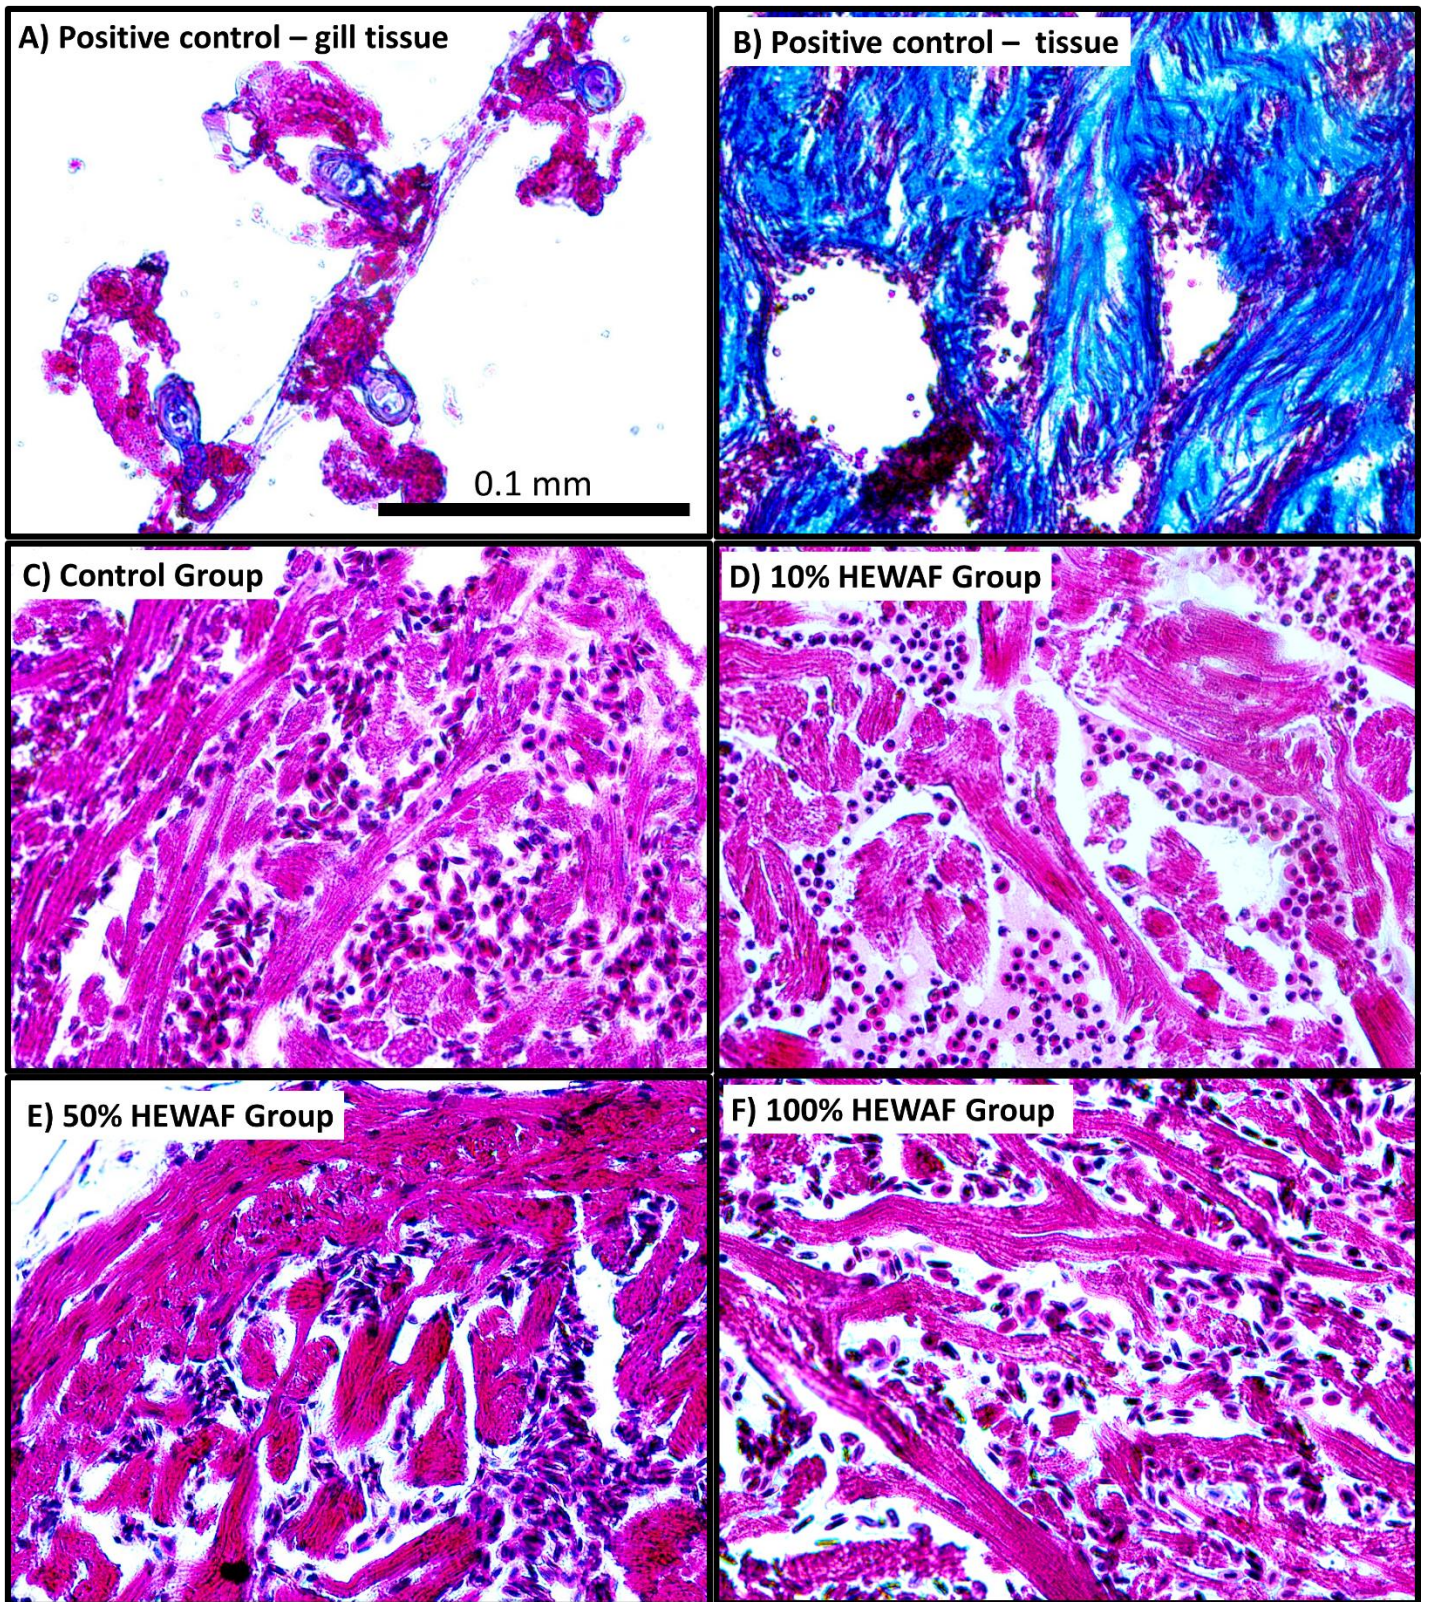

**Table. S1. List of components and nominal concentrations (ug/Kg and mg/kg) for each diet treatment.** The sum of all the components listed below was considered the “Total PAH concentration”. The components highlighted with gray color were considered for the 50 PAHs most frequently measured PAHs (Dubansky et al., 2018; Johansen et al., 2017). ND= not determined.

| Polycyclic Aromatic Hydrocarbon (PAHs) Concentrations in dietary treatments |                            |                         |                         |                          |                  |
|-----------------------------------------------------------------------------|----------------------------|-------------------------|-------------------------|--------------------------|------------------|
| COMPONENT                                                                   | CONTROL<br>FOOD<br>(ug/Kg) | 10%<br>HEWAF<br>(ug/Kg) | 50%<br>HEWAF<br>(ug/Kg) | 100%<br>HEWAF<br>(ug/Kg) | BLANK<br>(ug/Kg) |
| cis/trans-Decalin                                                           | 117                        | 63.2                    | 72.6                    | 113                      | ND               |
| C1-Decalins                                                                 | ND                         | 116                     | 115                     | 212                      | ND               |
| C2-Decalins                                                                 | ND                         | 175                     | 269                     | 422                      | ND               |
| C3-Decalins                                                                 | ND                         | ND                      | 412                     | 745                      | ND               |
| C4-Decalins                                                                 | ND                         | ND                      | 518                     | 940                      | ND               |
| Benzo(b)thiophene                                                           | ND                         | ND                      | ND                      | ND                       | ND               |
| C1-Benzothiophenes                                                          | ND                         | ND                      | ND                      | 29.3                     | ND               |
| C2-Benzothiophenes                                                          | ND                         | ND                      | ND                      | 33.1                     | ND               |
| C3-Benzothiophenes                                                          | ND                         | ND                      | ND                      | 41.6                     | ND               |
| C4-Benzothiophenes                                                          | ND                         | ND                      | ND                      | ND                       | ND               |
| Naphthalene                                                                 | 7.78                       | 36.7                    | 164                     | 312                      | 0.493            |
| C1-Naphthalenes                                                             | ND                         | 133                     | 666                     | 1330                     | ND               |
| C2-Naphthalenes                                                             | ND                         | 274                     | 1340                    | 2470                     | ND               |
| C3-Naphthalenes                                                             | ND                         | 245                     | 1270                    | 2140                     | ND               |
| C4-Naphthalenes                                                             | ND                         | 218                     | 781                     | 1310                     | ND               |
| Biphenyl                                                                    | ND                         | 19.5                    | 99.6                    | 174                      | ND               |
| Dibenzofuran                                                                | ND                         | ND                      | 17.0                    | 33.6                     | ND               |
| Acenaphthylene                                                              | ND                         | ND                      | D                       | ND                       | ND               |
| Acenaphthene                                                                | ND                         | ND                      | 9.28                    | 18.9                     | ND               |
| Fluorene                                                                    | ND                         | 18.9                    | 102                     | 206                      | ND               |
| C1-Fluorenes                                                                | ND                         | 53.9                    | 294                     | 563                      | ND               |
| C2-Fluorenes                                                                | ND                         | 126                     | 466                     | 858                      | ND               |
| C3-Fluorenes                                                                | ND                         | ND                      | 465                     | 810                      | ND               |
| Anthracene                                                                  | ND                         | ND                      | ND                      | ND                       | ND               |
| Phenanthrene                                                                | 7.16                       | 46.0                    | 232                     | 456                      | ND               |
| C1-<br>Phenanthrenes/Anthracenes                                            | ND                         | 114                     | 580                     | 1130                     | ND               |
| C2-<br>Phenanthrenes/Anthracenes                                            | ND                         | 114                     | 686                     | 1260                     | ND               |
| C3-<br>Phenanthrenes/Anthracenes                                            | ND                         | 85.5                    | 466                     | 908                      | ND               |
| C4-<br>Phenanthrenes/Anthracenes                                            | ND                         | ND                      | 249                     | 639                      | ND               |
| Retene                                                                      | ND                         | ND                      | 13.7                    | 22.3                     | ND               |
| Dibenzothiophene                                                            | ND                         | ND                      | 30.2                    | 55.3                     | ND               |
| C1-Dibenzothiophenes                                                        | ND                         | ND                      | 112                     | 207                      | ND               |
| C2-Dibenzothiophenes                                                        | ND                         | ND                      | 163                     | 327                      | ND               |
| C3-Dibenzothiophenes                                                        | ND                         | ND                      | 109                     | 256                      | ND               |
| C4-Dibenzothiophenes                                                        | ND                         | ND                      | ND                      | ND                       | ND               |
| Benzo(b)fluorene                                                            | ND                         | ND                      | 9.14                    | 20.0                     | ND               |

|                            |                |                |                |                |                |
|----------------------------|----------------|----------------|----------------|----------------|----------------|
| Fluoranthene               | ND             | ND             | ND             | 11.0           | ND             |
| Pyrene                     | ND             | ND             | 20.6           | 39.2           | ND             |
| C1-Fluoranthenes/Pyrenes   | ND             | ND             | 67.1           | 122            | ND             |
| C2-Fluoranthenes/Pyrenes   | ND             | ND             | 141            | 255            | ND             |
| C3-Fluoranthenes/Pyrenes   | ND             | ND             | 136            | 274            | ND             |
| C4-Fluoranthenes/Pyrenes   | ND             | ND             | ND             | 227            | ND             |
| Naphthobenzothiophene      | ND             | ND             | ND             | 16.4           | ND             |
| C1-Naphthobenzothiophenes  | ND             | ND             | ND             | 85.8           | ND             |
| C2-Naphthobenzothiophenes  | ND             | ND             | ND             | ND             | ND             |
| C3-Naphthobenzothiophenes  | ND             | ND             | ND             | ND             | ND             |
| C4-Naphthobenzothiophenes  | ND             | ND             | ND             | ND             | ND             |
| Benz(a)anthracene          | 6.31           | ND             | ND             | 11.6           | ND             |
| Chrysene                   | ND             | ND             | 53.4           | 77.2           | ND             |
| C1-Chrysenes               | ND             | ND             | 103            | 191            | ND             |
| C2-Chrysenes               | ND             | ND             | 163            | 294            | ND             |
| C3-Chrysenes               | ND             | ND             | ND             | ND             | ND             |
| C4-Chrysenes               | ND             | ND             | ND             | ND             | ND             |
| Benzo(b)fluoranthene       | ND             | ND             | ND             | ND             | ND             |
| Benzo(k)fluoranthene       | ND             | ND             | ND             | ND             | ND             |
| Benzo(a)fluoranthene       | ND             | ND             | ND             | ND             | ND             |
| Benzo(e)pyrene             | ND             | ND             | ND             | 14.7           | ND             |
| C30-Hopane                 | ND             | ND             | 55.5           | 98.9           | ND             |
| Benzo(a)pyrene             | ND             | ND             | ND             | ND             | ND             |
| Perylene                   | ND             | ND             | ND             | ND             | ND             |
| Indeno(1,2,3-cd)pyrene     | ND             | ND             | ND             | ND             | ND             |
| Dibenz(a,h)anthracene      | ND             | ND             | ND             | ND             | ND             |
| Benzo(g,h,i)perylene       | ND             | ND             | ND             | ND             | ND             |
| 4-Methyldibenzothiophene   | ND             | 8.04           | 48.6           | 101            | ND             |
| 2-Methyldibenzothiophene   | ND             | ND             | 20.2           | 39.9           | ND             |
| 1-Methyldibenzothiophene   | ND             | ND             | 16.2           | 28.8           | ND             |
| 3-Methylphenanthrene       | ND             | 18.5           | 101            | 211            | ND             |
| 2-Methylphenanthrene       | ND             | 22.4           | 120            | 249            | ND             |
| 2-Methylanthracene         | ND             | ND             | ND             | ND             | ND             |
| 9-Methylphenanthrene       | ND             | 23.8           | 135            | 275            | ND             |
| 1-Methylphenanthrene       | ND             | 21.3           | 106            | 207            | ND             |
| 2-Methylnaphthalene        | ND             | 95.5           | 506            | 1010           | ND             |
| 1-Methylnaphthalene        | ND             | 92.4           | 491            | 858            | ND             |
| 2,6-Dimethylnaphthalene    | ND             | 72.6           | 467            | 913            | ND             |
| 2,3,5-Trimethylnaphthalene | ND             | 71.3           | 313            | 575            | ND             |
| Carbazole                  | ND             | ND             | ND             | ND             | ND             |
| Fluorene-d10               | 82             | 78             | 80             | 73             | 87             |
| Fluoranthene-d10           | 94             | 84             | 92             | 83             | 90             |
| Terphenyl-d14              | 88             | 87             | 95             | 85             | 90             |
|                            | <b>CONTROL</b> | <b>10%</b>     | <b>50%</b>     | <b>100%</b>    | <b>BLANK</b>   |
|                            | <b>FOOD</b>    | <b>HEWAF</b>   | <b>HEWAF</b>   | <b>HEWAF</b>   | <b>BLANK</b>   |
|                            | <b>(ug/Kg)</b> | <b>(ug/Kg)</b> | <b>(ug/Kg)</b> | <b>(ug/Kg)</b> | <b>(ug/Kg)</b> |
| SUM TOTAL PAH              | 138.25         | 2264.54        | 12774.12       | 24227.60       | 0.493          |

|               |                |                |                |                |                |
|---------------|----------------|----------------|----------------|----------------|----------------|
| SUM TPAH50    | 21.25          | 1484.50        | 8994.32        | 17102.70       | 0.493          |
|               | <b>CONTROL</b> | <b>10%</b>     | <b>50%</b>     | <b>100%</b>    | <b>BLANK</b>   |
|               | <b>FOOD</b>    | <b>HEWAF</b>   | <b>HEWAF</b>   | <b>HEWAF</b>   | <b>BLANK</b>   |
|               | <b>(mg/Kg)</b> | <b>(mg/Kg)</b> | <b>(mg/Kg)</b> | <b>(mg/Kg)</b> | <b>(mg/Kg)</b> |
| SUM TOTAL PAH | 0.14           | 2.27           | 12.77          | 24.23          | 0.00           |
| SUM TPAH50    | 0.02           | 1.485          | 8.994          | 17.10          | 0.00           |

**Table. S2. List of components and nominal concentrations (ug/Kg and mg/kg) of for Alkylated PAHs in whole body fish per experimental group.** The sum of all the components is listed at the bottom of each column. ND= not determined.

| Component                    | Control Female | Control Male | 10%HEWAF Female | 10%HEWAF Male | 50%HEWAF Female | 50%HEWAF Male | 100%HEWAF Female | 100%HEWAF Male | Blank method |
|------------------------------|----------------|--------------|-----------------|---------------|-----------------|---------------|------------------|----------------|--------------|
| Naphthalene                  | ND             | 1.4          | 1.8             | 0.95          | 1.1             | ND            | 1.0              | 1.2            | ND           |
| 2-Methylnaphthalene          | 1.6            | ND           | 2.0             | ND            | 1.4             | 1.9           | 2.0              | 2.3            | ND           |
| 1-Methylnaphthalene          | 1.4            | ND           | 2.1             | ND            | 1.3             | 1.4           | 1.5              | 1.8            | ND           |
| C2-Naphthalenes              | ND             | ND           | ND              | ND            | 8.1             | 6.8           | 15               | ND             | ND           |
| C3-Naphthalenes              | ND             | ND           | 6.7             | ND            | 7.3             | 8.5           | 17               | ND             | ND           |
| C4-Naphthalenes              | ND             | ND           | ND              | ND            | ND              | ND            | ND               | ND             | ND           |
| Biphenyl                     | ND             | ND           | ND              | ND            | ND              | ND            | ND               | 2.3            | ND           |
| Acenaphthylene               | ND             | ND           | ND              | ND            | ND              | ND            | ND               | ND             | ND           |
| Dibenzofuran                 | 1.6            | 0.79         | 0.96            | ND            | ND              | ND            | ND               | 0.99           | ND           |
| Acenaphthene                 | ND             | ND           | ND              | ND            | ND              | ND            | ND               | ND             | ND           |
| Fluorene                     | 1.1            | 1.3          | 1.9             | 0.98          | 1.6             | 1.1           | 1.6              | 1.6            | ND           |
| C1-Fluorenes                 | ND             | ND           | ND              | ND            | ND              | ND            | 6.1              | ND             | ND           |
| C2-Fluorenes                 | ND             | ND           | ND              | ND            | ND              | ND            | ND               | ND             | ND           |
| C3-Fluorenes                 | ND             | ND           | ND              | ND            | ND              | ND            | ND               | ND             | ND           |
| Dibenzothiophene             | ND             | ND           | 1.1             | ND            | ND              | ND            | 0.92             | ND             | ND           |
| C1-Dibenzothiophenes         | ND             | ND           | ND              | ND            | ND              | ND            | ND               | ND             | ND           |
| C2-Dibenzothiophenes         | ND             | ND           | ND              | ND            | ND              | ND            | ND               | ND             | ND           |
| C3-Dibenzothiophenes         | ND             | ND           | ND              | ND            | ND              | ND            | ND               | ND             | ND           |
| Phenanthrene                 | 7.5            | 6.3          | 12              | 7.8           | 7.5             | 6.5           | 9.1              | 8.1            | ND           |
| Anthracene                   | ND             | ND           | ND              | ND            | ND              | ND            | ND               | ND             | ND           |
| C1-Phenanthrenes/Anthracenes | ND             | ND           | 7.0             | ND            | ND              | ND            | 8.6              | ND             | ND           |
| C2-Phenanthrenes/Anthracenes | ND             | ND           | ND              | ND            | ND              | ND            | ND               | ND             | ND           |
| C3-Phenanthrenes/Anthracenes | ND             | ND           | ND              | ND            | ND              | ND            | ND               | ND             | ND           |
| C4-Phenanthrenes/Anthracenes | ND             | ND           | ND              | ND            | ND              | ND            | ND               | ND             | ND           |
| Fluoranthene                 | 1.2            | 1.1          | 1.3             | ND            | ND              | ND            | ND               | ND             | ND           |
| Pyrene                       | 0.62           | ND           | ND              | ND            | ND              | ND            | ND               | ND             | ND           |



|                          |             |              |              |             |             |             |              |              |          |
|--------------------------|-------------|--------------|--------------|-------------|-------------|-------------|--------------|--------------|----------|
| C1-Fluoranthenes/Pyrenes | ND          | ND           | ND           | ND          | ND          | ND          | ND           | ND           | ND       |
| Benz(a)anthracene        | 0.48        | ND           | ND           | ND          | ND          | ND          | ND           | ND           | ND       |
| Chrysene                 | ND          | ND           | ND           | ND          | ND          | ND          | ND           | ND           | ND       |
| C1-Chrysenes             | ND          | ND           | ND           | ND          | ND          | ND          | ND           | ND           | ND       |
| C2-Chrysenes             | ND          | ND           | ND           | ND          | ND          | ND          | ND           | ND           | ND       |
| C3-Chrysenes             | ND          | ND           | ND           | ND          | ND          | ND          | ND           | ND           | ND       |
| C4-Chrysenes             | ND          | ND           | ND           | ND          | ND          | ND          | ND           | ND           | ND       |
| Benzo(b)fluoranthene     | ND          | ND           | ND           | ND          | ND          | ND          | ND           | ND           | ND       |
| Benzo(k)fluoranthene     | ND          | ND           | ND           | ND          | ND          | ND          | ND           | ND           | ND       |
| Benzo(e)pyrene           | ND          | ND           | ND           | ND          | ND          | ND          | ND           | ND           | ND       |
| Benzo(a)pyrene           | ND          | ND           | ND           | ND          | ND          | ND          | ND           | ND           | ND       |
| Perylene                 | ND          | ND           | ND           | ND          | ND          | ND          | ND           | ND           | ND       |
| Indeno(1,2,3-cd)pyrene   | ND          | ND           | ND           | ND          | ND          | ND          | ND           | ND           | ND       |
| Dibenz(a,h)anthracene    | ND          | ND           | ND           | ND          | ND          | ND          | ND           | ND           | ND       |
| Benzo(g,h,i)perylene     | ND          | ND           | ND           | ND          | ND          | ND          | ND           | ND           | ND       |
| Fluorene-d10             | 66          | 69           | 66           | 53          | 60          | 53          | 56           | 67           | 68       |
| Fluoranthene-d10         | 88          | 88           | 85           | 67          | 76          | 67          | 69           | 85           | 84       |
| Terphenyl-d14            | 87          | 90           | 87           | 73          | 81          | 73          | 74           | 93           | 81       |
| <b>SUM TOTAL</b>         | <b>15.5</b> | <b>10.89</b> | <b>36.86</b> | <b>9.73</b> | <b>28.3</b> | <b>26.2</b> | <b>62.82</b> | <b>18.29</b> | <b>0</b> |
